# Supplementary material for: Facile synthesis of yolk–shell structured ZnFe2O4 microspheres for enhanced electrocatalytic oxygen evolution reaction
Source: Royal Society of Chemistry journal article supplement (doi:10.1039/c8qi01191e), 2018-12-27
Supplement: c8qi01191e1.pdf [file c8qi01191e1.pdf]

**Electronic supplementary information (ESI) for “*Facile Synthesis of Yolk-Shell Structured  $\text{ZnFe}_2\text{O}_4$  Microspheres for Enhanced Electrocatalytic Oxygen Evolution Reaction*”**

Li Li<sup>1</sup>, Yongxing Zhang<sup>1\*</sup>, Jia Li<sup>1</sup>, Wang Huo<sup>1</sup>, Bing Li<sup>1</sup>, Juan Bai<sup>2</sup>, Yu Cheng<sup>2</sup>, Huijie Tang<sup>3</sup>, and Xuanhua Li<sup>3\*</sup>

<sup>1</sup> Department of Materials Science and Engineering, Huaibei Normal University, Huaibei 235000, P. R. China

<sup>2</sup> School of Materials Science and Engineering, Shaanxi Normal University, Xi'an 710119, P. R. China

<sup>3</sup> State Key Laboratory of Solidification Processing Center of Nano Energy Materials, School of Materials Science and Engineering, Northwestern Polytechnical University Xi'an 710072, P. R. China

E-mail: zyx07157@mail.ustc.edu.cn; E-mail: lixh32@nwpu.edu.cn

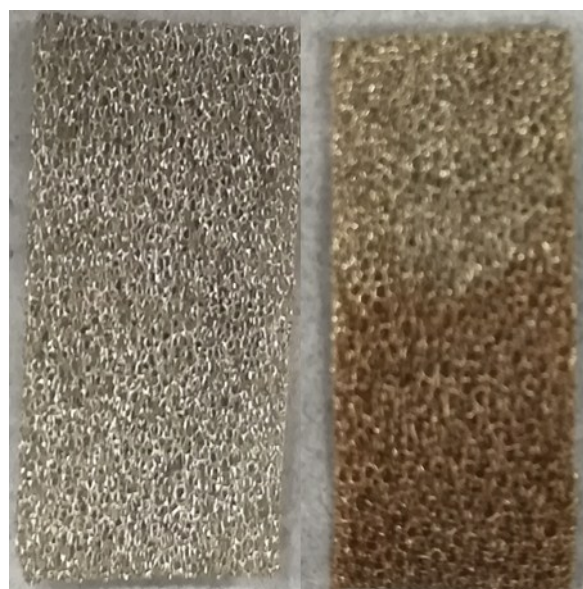

**Figure S1.** Optical photographs of NF (left) and YS- $\text{ZnFe}_2\text{O}_4$ /NF (right).

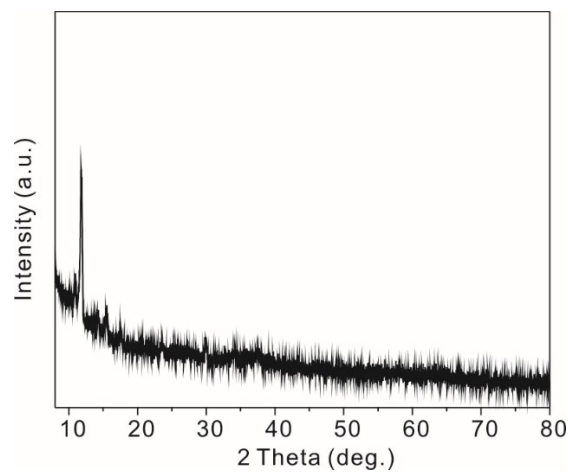

**Figure S2.** XRD pattern of the YS-ZnFe<sub>2</sub>O<sub>4</sub> precursors.

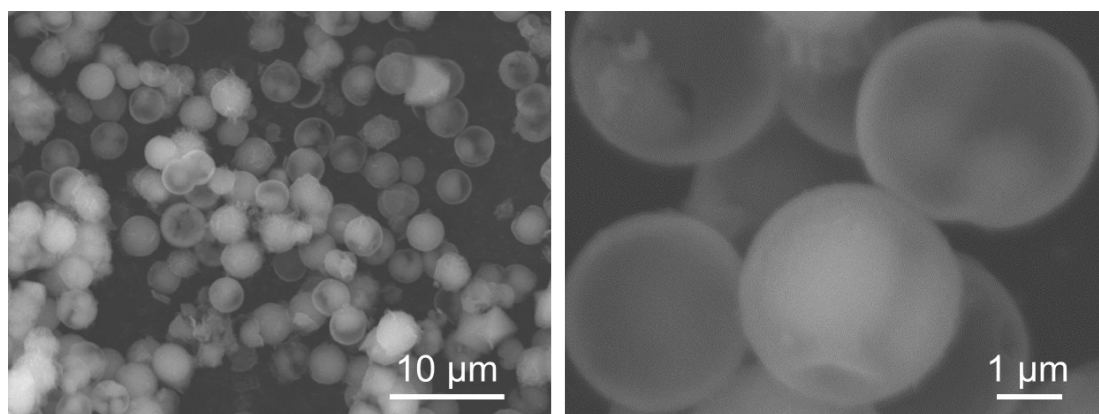

**Figure S3.** SEM images of the YS-ZnFe<sub>2</sub>O<sub>4</sub> precursors: (a) overall morphology; (b) low-magnification.

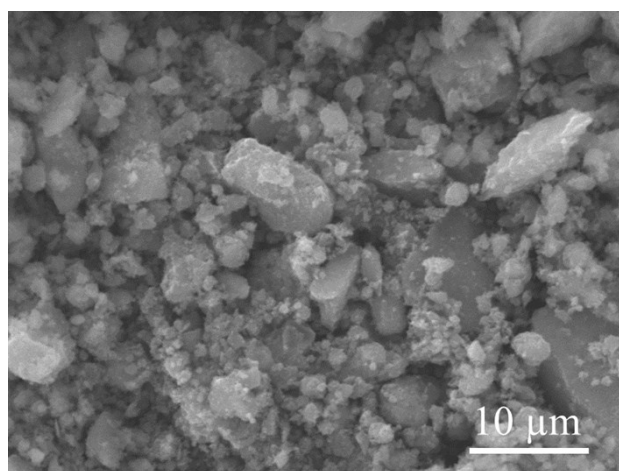

**Figure S4.** SEM image of ZnFe<sub>2</sub>O<sub>4</sub> without SDS.

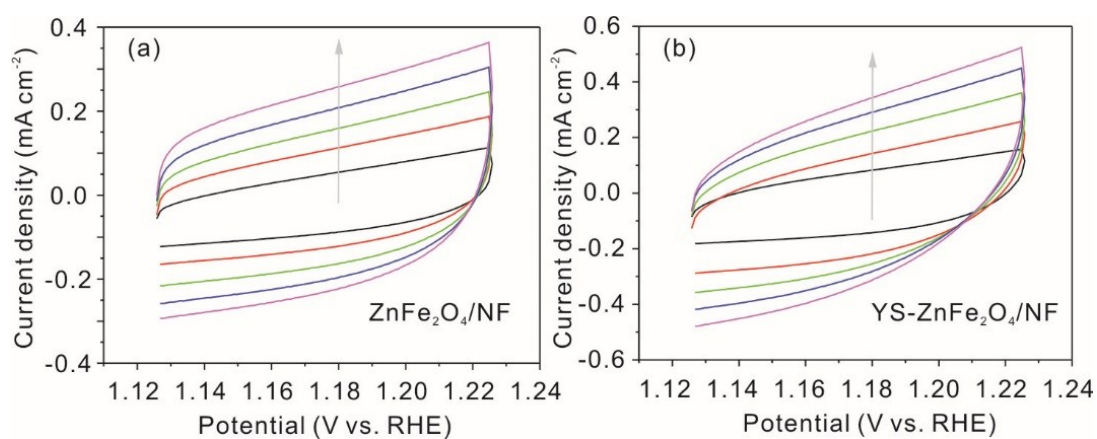

**Figure S5.** CVs of the various catalysts at the different scan rates from  $10 \text{ mV} \cdot \text{s}^{-1}$  to  $100 \text{ mV} \cdot \text{s}^{-1}$  measured in the potential range of 1.125 V to 1.225 V vs. RHE.

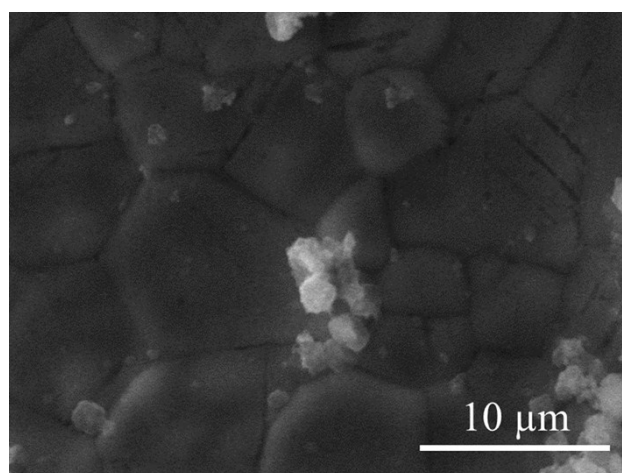

**Figure S6.** The SEM image of YS-ZnFe<sub>2</sub>O<sub>4</sub>/NF after i-t test.
